# Supplementary material for: Assessment of Groundwater Quality and the Main Controls on Its Hydrochemistry in a Changing Climate in Morocco (Essaouira Basin)
Source: MDPI journal article supplement (doi:10.3390/su14138012), 2022-06-30
Supplement: s1 [file s1]

# Supplementary Materials

## Supplementary Tables:

**Table S1.** Physicochemical Parameters of the Analyzed Samples from the Plio-Quaternary and Turonian Aquifer of all the 105 groundwater samples of four campaigns 2009. 2017. 2018 and 2019.

| Sample        | pH   | EC      | TDS     | T     | Ca <sup>2+</sup> | Mg <sup>2+</sup> | Na <sup>+</sup> | K <sup>-</sup> | HCO <sub>3</sub> <sup>-</sup> | Cl <sup>-</sup> | SO <sub>4</sub> <sup>2-</sup> | NO <sub>3</sub> <sup>-</sup> | IB    |
|---------------|------|---------|---------|-------|------------------|------------------|-----------------|----------------|-------------------------------|-----------------|-------------------------------|------------------------------|-------|
|               |      | μS/cm   | mg/L    | °C    | mg/L             |                  |                 |                |                               |                 |                               |                              | %     |
| Campaign 2009 |      |         |         |       |                  |                  |                 |                |                               |                 |                               |                              |       |
| E1            | 7.37 | 2440    | 1220    | 20    | 40.00            | 38.64            | 266.80          | 5.46           | 146.40                        | 475.70          | 128.64                        | 31.00                        | -5.78 |
| E2            | 7.31 | 3520    | 1760    | 21    | 38.00            | 45.96            | 438.15          | 10.53          | 109.80                        | 766.80          | 124.80                        | 89.28                        | -4.69 |
| E3            | 7.41 | 2040    | 1020    | 20    | 40.00            | 30.24            | 221.95          | 13.65          | 207.40                        | 347.90          | 104.64                        | 45.26                        | -5.34 |
| E4            | 7.4  | 2249    | 1124.5  | 19    | 42.00            | 39.84            | 207.69          | 10.53          | 176.90                        | 390.50          | 102.72                        | 0.62                         | -4.51 |
| E5            | 7.41 | 1763    | 881.5   | 19    | 44.00            | 35.04            | 138.69          | 4.68           | 219.60                        | 241.40          | 121.44                        | 10.54                        | -7.71 |
| E6            | 7.5  | 1720    | 860     | 23    | 46.00            | 41.04            | 127.42          | 5.46           | 195.20                        | 255.60          | 119.52                        | 13.64                        | -7.20 |
| E7            | 7.3  | 1671    | 835.5   | 21    | 38.00            | 31.44            | 135.70          | 4.68           | 176.90                        | 217.97          | 111.84                        | 6.82                         | -4.46 |
| E8            | 7.39 | 1947    | 973.5   | 23    | 34.00            | 35.04            | 184.23          | 4.29           | 183                           | 319.50          | 111.84                        | 8.06                         | -6.50 |
| E9            | 7.15 | 2180    | 1090    | 20    | 42.00            | 38.64            | 212.98          | 4.29           | 189.10                        | 355.00          | 129.60                        | 27.28                        | -5.18 |
| E10           | 7.17 | 1969    | 984.5   | 27    | 38.00            | 35.04            | 149.96          | 5.07           | 195.20                        | 270.51          | 104.64                        | 8.06                         | -6.94 |
| E11           | 7.24 | 2550    | 1275    | 22    | 40.00            | 42.36            | 236.44          | 3.90           | 146.40                        | 442.33          | 96.00                         | 50.84                        | -5.45 |
| E12           | 7.44 | 2130    | 1065    | 19    | 34.00            | 30.24            | 254.38          | 5.85           | 195.20                        | 344.35          | 44.64                         | 199                          | -5.09 |
| E13           | 7.69 | 2340    | 1170    | 25    | 38.00            | 30.24            | 286.35          | 15.21          | 231.80                        | 420.32          | 133.92                        | 0                            | -3.40 |
| Min           | 7.15 | 1671    | 835.5   | 19    | 34               | 30.24            | 127.42          | 3.9            | 109.8                         | 217.97          | 44.64                         | 0                            | -7.71 |
| Max           | 7.69 | 3520    | 1760    | 27    | 46               | 45.96            | 438.15          | 15.21          | 231.8                         | 766.8           | 133.92                        | 199                          | -3.40 |
| Moy           | 7.37 | 2193.77 | 1096.88 | 21.46 | 39.54            | 36.44            | 220.06          | 7.20           | 182.53                        | 372.91          | 110.33                        | 37.72                        | -5.56 |
| SD            | 0.14 | 482.48  | 241.24  | 2.47  | 3.48             | 5.12             | 83.82           | 3.88           | 32.80                         | 142.38          | 22.96                         | 54.68                        | 1.23  |
| Campaign 2017 |      |         |         |       |                  |                  |                 |                |                               |                 |                               |                              |       |
| E14           | 7.7  | 3066    | 1620    | 22.2  | 131.50           | 75.80            | 482.60          | 14.10          | 366.10                        | 1093.40         | 48.20                         | 11.80                        | -5.38 |
| E15           | 7.3  | 4226    | 2205    | 22.9  | 368.70           | 161.40           | 292.00          | 12.20          | 244.10                        | 1519.40         | 134.30                        | 16.50                        | -5.53 |

| Sample | pH  | EC    | TDS  | T    | Ca <sup>2+</sup> | Mg <sup>2+</sup> | Na <sup>+</sup> | K <sup>-</sup> | HCO <sub>3</sub> <sup>-</sup> | Cl <sup>-</sup> | SO <sub>4</sub> <sup>2-</sup> | NO <sub>3</sub> <sup>-</sup> | IB    |
|--------|-----|-------|------|------|------------------|------------------|-----------------|----------------|-------------------------------|-----------------|-------------------------------|------------------------------|-------|
|        |     | μS/cm | mg/L | °C   | mg/L             |                  |                 |                |                               |                 |                               |                              | %     |
| E16    | 7.8 | 762   | 396  | 22.9 | 83.40            | 33               | 95              | 4.40           | 262.40                        | 170.40          | 16.20                         | 31                           | 5.59  |
| E17    | 7.7 | 926   | 478  | 23.4 | 83.40            | 33               | 85              | 4.70           | 189.10                        | 170.40          | 18.70                         | 61.10                        | 7.08  |
| E18    | 7.6 | 2550  | 1276 | 25   | 211.60           | 114.70           | 198             | 17.80          | 384.40                        | 795.20          | 60.50                         | 11.80                        | -1.89 |
| E19    | 7.6 | 2866  | 1488 | 23.1 | 208.40           | 105              | 243.60          | 11.40          | 219.70                        | 1050.80         | 97.40                         | 11.90                        | -8.47 |
| E20    | 7.7 | 2835  | 1473 | 23.1 | 149.10           | 69               | 298.40          | 12.20          | 311.20                        | 795.20          | 104.80                        | 87.60                        | -8.20 |
| E21    | 7.1 | 2429  | 1262 | 23   | 118.60           | 106.90           | 260.70          | 10.70          | 427.10                        | 809.40          | 43.30                         | 28.20                        | -8.45 |
| E22    | 7.8 | 2333  | 1240 | 22   | 192.40           | 128.30           | 217             | 9.10           | 219.70                        | 837.80          | 82.60                         | 37.10                        | 0.47  |
| E23    | 7.5 | 2442  | 1246 | 23.9 | 139.50           | 80.70            | 240             | 8.50           | 286.80                        | 653.20          | 131.80                        | 35.20                        | -4.30 |
| E24    | 7.5 | 724   | 409  | 18.9 | 60.90            | 31.10            | 115.00          | 15.50          | 341.70                        | 198.80          | 26.10                         | 6.80                         | -3.78 |
| E25    | 7.6 | 7555  | 4273 | 18.9 | 344.70           | 205.10           | 1430.90         | 69             | 268.50                        | 3138.20         | 257.20                        | 75.10                        | -0.71 |
| E26    | 7.3 | 2049  | 1066 | 23   | 113.80           | 61.20            | 291.40          | 10             | 482                           | 525.40          | 58.00                         | 81.30                        | -3.26 |
| E27    | 7.5 | 1453  | 783  | 21.2 | 123.40           | 53.50            | 178.60          | 11.90          | 317.30                        | 454.40          | 11.30                         | 6                            | 0.76  |
| E28    | 7.9 | 1859  | 1022 | 20.2 | 117.00           | 51.50            | 245.40          | 74.50          | 567.40                        | 511.20          | 58                            | 16.40                        | -5.30 |
| E29    | 7.5 | 3173  | 1655 | 22.9 | 91.40            | 82.60            | 402.50          | 13.70          | 475.90                        | 794             | 104.80                        | 63.30                        | -6.68 |
| E30    | 7.4 | 2913  | 1563 | 21.4 | 176.40           | 77.80            | 438.90          | 19.80          | 402.70                        | 738.40          | 114.60                        | 126.50                       | 4.42  |
| E31    | 8   | 1772  | 954  | 20.9 | 72.10            | 61.20            | 185.40          | 10.20          | 268.50                        | 497             | 55.60                         | 54.00                        | -9.33 |
| E32    | 7.6 | 1298  | 700  | 21.2 | 136.30           | 53.50            | 155.20          | 13.60          | 329.50                        | 355             | 87.50                         | 20.80                        | 2.04  |
| E33    | 7.4 | 1935  | 1034 | 21.7 | 110.60           | 86.50            | 178.60          | 6.50           | 396.60                        | 472.20          | 90                            | 37.10                        | -4.02 |
| E34    | 8   | 1151  | 616  | 21.5 | 44.90            | 35               | 153.60          | 8.10           | 333.20                        | 234             | 87.50                         | 9.90                         | -7.81 |
| E35    | 7.7 | 1558  | 819  | 22.4 | 96.20            | 79.70            | 140.30          | 5.90           | 378.30                        | 411.80          | 119.50                        | 23.80                        | -8.03 |
| E36    | 7.4 | 1110  | 612  | 20.1 | 83.40            | 52.50            | 120.00          | 5.90           | 317.30                        | 312.40          | 94.90                         | 8.50                         | -7.58 |
| E37    | 7.5 | 1836  | 969  | 22.4 | 91.40            | 67.10            | 179.10          | 9.20           | 347.80                        | 460.40          | 146.60                        | 9.50                         | -9.46 |
| E38    | 7.8 | 1757  | 941  | 21.6 | 78.60            | 90.40            | 169.30          | 8.20           | 311.20                        | 497.00          | 156.40                        | 17.50                        | -8.95 |
| E39    | 7.2 | 2023  | 1026 | 24.2 | 113.80           | 88.50            | 166.10          | 7.00           | 305.10                        | 539.60          | 77.70                         | 48.50                        | -5.25 |
| E40    | 7.8 | 2293  | 1092 | 27.4 | 96.20            | 93.30            | 230.00          | 18.40          | 372.20                        | 568.00          | 129.30                        | 9.00                         | -4.19 |
| E41    | 7.8 | 1771  | 878  | 25.4 | 104.20           | 96.20            | 164.90          | 17.40          | 244.10                        | 553.80          | 107.20                        | 10.30                        | -3.01 |
| E42    | 7.6 | 2298  | 1171 | 24   | 174.70           | 74.80            | 213.70          | 8.10           | 341.70                        | 681.60          | 163.80                        | 27.40                        | -8.11 |

| Sample        | pH   | EC      | TDS     | T     | Ca <sup>2+</sup> | Mg <sup>2+</sup> | Na <sup>+</sup> | K <sup>-</sup> | HCO <sub>3</sub> <sup>-</sup> | Cl <sup>-</sup> | SO <sub>4</sub> <sup>2-</sup> | NO <sub>3</sub> <sup>-</sup> | IB    |
|---------------|------|---------|---------|-------|------------------|------------------|-----------------|----------------|-------------------------------|-----------------|-------------------------------|------------------------------|-------|
|               |      | μS/cm   | mg/L    | °C    | mg/L             |                  |                 |                |                               |                 |                               |                              | %     |
| E43           | 7.3  | 1896    | 941     | 25.4  | 112.20           | 85.50            | 158.60          | 7.70           | 378.30                        | 482.80          | 94.90                         | 14.90                        | -5.52 |
| E44           | 7.2  | 1892    | 922     | 26.4  | 120.20           | 71               | 152.80          | 7.90           | 366.10                        | 468.60          | 134.30                        | 15.20                        | -8.72 |
| Min           | 7.1  | 724     | 396     | 18.9  | 44.90            | 31.10            | 85.00           | 4.40           | 189.10                        | 170.40          | 11.30                         | 6                            | -9.46 |
| Max           | 8    | 7555    | 4273    | 27.4  | 368.70           | 205.10           | 1430.90         | 74.50          | 567.40                        | 3138.20         | 257.20                        | 126.50                       | 7.08  |
| Moy           | 7.57 | 2217.77 | 1165.48 | 22.66 | 133.84           | 80.83            | 254.28          | 14.63          | 337.29                        | 670.64          | 93.97                         | 32.71                        | -4.25 |
| Sd            | 0.23 | 1253.77 | 700.02  | 1.98  | 72.13            | 36.87            | 237.58          | 15.80          | 82.76                         | 541.43          | 51.35                         | 29.16                        | 4.55  |
| Campaign 2018 |      |         |         |       |                  |                  |                 |                |                               |                 |                               |                              |       |
| E45           | 7.73 | 3608    | 1807    | 21.9  | 168.50           | 68.75            | 414.50          | 29.25          | 250.10                        | 1004.50         | 11.00                         | 4                            | 0.17  |
| E46           | 7.82 | 916     | 458     | 22.16 | 61.65            | 14.20            | 76.75           | 2.90           | 231.80                        | 98.80           | 25.85                         | 28.35                        | 0.50  |
| E47           | 7.6  | 1082    | 541     | 23.27 | 68.94            | 59.29            | 81.36           | 1.89           | 286.78                        | 284             | 28.52                         | 29.30                        | -7.29 |
| E48           | 7.39 | 4933    | 2471    | 23.32 | 349.50           | 100              | 461             | 23.50          | 164.70                        | 1357.50         | 171.00                        | 13.50                        | 1.70  |
| E49           | 7.2  | 2794    | 1939    | 23.62 | 148.60           | 88               | 245.80          | 8.20           | 347.70                        | 629.20          | 64.40                         | 21.60                        | 0.83  |
| E50           | 7.82 | 2638    | 1321    | 22.25 | 152              | 83.40            | 226.60          | 3.60           | 262.30                        | 540.20          | 182                           | 41.40                        | 0.83  |
| E51           | 7.86 | 1960    | 981     | 25.19 | 91.40            | 65.70            | 140.60          | 12             | 164.70                        | 388.60          | 125.30                        | 0                            | 0.37  |
| E52           | 7.99 | 2716    | 1359    | 26.25 | 149.60           | 70.40            | 168.40          | 10.40          | 305                           | 542.20          | 26.80                         | 0                            | -0.01 |
| E53           | 7.64 | 3034    | 1519    | 23.15 | 178.40           | 77.60            | 279.80          | 5.80           | 201.30                        | 770.20          | 116.20                        | 2.60                         | 0.22  |
| E54           | 7.92 | 2731    | 1368    | 20.47 | 180.40           | 76.60            | 219.60          | 4.20           | 225.70                        | 662.20          | 113.20                        | 66.80                        | -1.67 |
| E55           | 8.09 | 6716    | 3359    | 21.29 | 364              | 114              | 829.00          | 30             | 189.10                        | 1930.00         | 406.00                        | 40                           | -1.73 |
| E56           | 7.9  | 2428    | 1214    | 21.53 | 93.40            | 59               | 275.60          | 12.40          | 280.60                        | 472.80          | 158.20                        | 0                            | 1.37  |
| E57           | 7.77 | 1557    | 779     | 19.84 | 100.50           | 25.40            | 134.40          | 11.90          | 250.10                        | 252.10          | 78.20                         | 6.20                         | 1.21  |
| E58           | 8.4  | 9744    | 4875    | 17.58 | 304              | 238              | 1464            | 66             | 140.30                        | 3158.00         | 323.00                        | 129                          | -0.03 |
| E59           | 8.05 | 1842    | 920     | 20.7  | 70.10            | 29.20            | 180.70          | 5.90           | 201.30                        | 307.40          | 78.50                         | 94.70                        | -4.20 |
| E60           | 7.37 | 3408    | 1705    | 20.73 | 227.50           | 83.75            | 431.50          | 20.75          | 262.30                        | 799.00          | 179.75                        | 398.25                       | 0.73  |
| E61           | 7.22 | 2699    | 1352    | 23.23 | 158.00           | 69.80            | 253.40          | 5.00           | 237.90                        | 577.40          | 151.80                        | 60.80                        | 0.92  |
| E62           | 7.71 | 2163    | 1084    | 20.29 | 112.22           | 44.71            | 236.70          | 25.41          | 549.14                        | 497             | 53.11                         | 15.30                        | -9.30 |
| E63           | 7.47 | 1602    | 800     | 21.17 | 122.40           | 27.10            | 120.60          | 9.30           | 305                           | 318.30          | 3.47                          | 0                            | -0.82 |
| E64           | 7.43 | 3482    | 1741    | 23.05 | 90               | 70.25            | 429.75          | 9.75           | 396.50                        | 765.00          | 129.25                        | 67.25                        | -4.32 |

| Sample        | pH   | EC      | TDS     | T      | Ca <sup>2+</sup> | Mg <sup>2+</sup> | Na <sup>+</sup> | K <sup>-</sup> | HCO <sub>3</sub> <sup>-</sup> | Cl <sup>-</sup> | SO <sub>4</sub> <sup>2-</sup> | NO <sub>3</sub> <sup>-</sup> | IB    |
|---------------|------|---------|---------|--------|------------------|------------------|-----------------|----------------|-------------------------------|-----------------|-------------------------------|------------------------------|-------|
|               |      | μS/cm   | mg/L    | °C     | mg/L             |                  |                 |                |                               |                 |                               |                              | %     |
| E65           | 8.65 | 2965    | 1481    | 25.84  | 96.80            | 85.40            | 319.40          | 7.60           | 12.20                         | 714.40          | 171.20                        | 32.60                        | 2.98  |
| E66           | 7.25 | 2176    | 1087    | 21.7   | 119.50           | 76.50            | 128.00          | 4              | 335.50                        | 376.00          | 132.70                        | 34.70                        | -4.01 |
| E67           | 7.77 | 1258    | 630     | 22.14  | 57.72            | 52.49            | 119.82          | 4.61           | 317.28                        | 184.60          | 92.46                         | 24.70                        | -0.80 |
| E68           | 7.51 | 1773    | 887     | 22.09  | 89.78            | 79.70            | 128.70          | 1.28           | 353.89                        | 383.40          | 119.51                        | 16.50                        | -7.49 |
| E69           | 7.29 | 2054    | 1028    | 26.54  | 123.45           | 72.90            | 173.08          | 2.54           | 384.40                        | 482.80          | 112.13                        | 11.70                        | -6.38 |
| E70           | 7.34 | 1967    | 976     | 27.08  | 111.90           | 63.20            | 155.20          | 4.60           | 317.20                        | 351.50          | 131.60                        | 8.70                         | -0.96 |
| E71           | 7.5  | 1957    | 981     | 22     | 90.10            | 60.60            | 168             | 4.10           | 268.40                        | 349.50          | 151.70                        | 8.70                         | -1.92 |
| E72           | 7.48 | 2187    | 1095    | 22.71  | 95.40            | 69.80            | 179.80          | 5.70           | 280.60                        | 424.10          | 157.80                        | 2.50                         | -3.69 |
| E73           | 8.24 | 1896    | 949     | 20.66  | 78.50            | 43.20            | 187.30          | 6.20           | 189.10                        | 378.90          | 162.40                        | 0                            | -4.22 |
| E74           | 7.45 | 1900    | 944     | 21.33  | 94.59            | 70.96            | 180.00          | 2.74           | 359.99                        | 440.20          | 136.72                        | 6                            | -7.06 |
| E75           | 7.34 | 3184    | 1597.00 | 24.06  | 90.42            | 66.38            | 210.08          | 5.57           | 312.57                        | 430.75          | 153.47                        | 34.56                        | -4.40 |
| Min           | 7.2  | 916     | 458     | 17.58  | 57.72            | 14.20            | 76.75           | 1.28           | 12.20                         | 98.80           | 3.47                          | 0                            | -9.30 |
| Max           | 8.65 | 9744    | 4875    | 2029   | 364              | 238              | 1464            | 66             | 549.14                        | 3158            | 406                           | 398.25                       | 2.98  |
| Moy           | 7.68 | 1395    | 1918.24 | 90.51  | 136.75           | 71.17            | 278.05          | 11.20          | 270.43                        | 640.99          | 127.33                        | 38.70                        | -1.89 |
| Sd            | 0.36 | 1724.70 | 869.08  | 360.24 | 78.32            | 37.80            | 266.15          | 12.96          | 95.75                         | 587.91          | 82.82                         | 73.27                        | 3.21  |
| Campaign 2019 |      |         |         |        |                  |                  |                 |                |                               |                 |                               |                              |       |
| E76           | 7.53 | 3800    | 1902    | 21.87  | 187.57           | 57.35            | 552.44          | 1.77           | 305                           | 1420.00         | 30.29                         | 4.50                         | -9.06 |
| E77           | 7.63 | 947     | 474     | 22.2   | 64.13            | 56.52            | 84.28           | 1.92           | 375.80                        | 226.60          | 36.18                         | 30                           | -8.76 |
| E78           | 7.66 | 880     | 440     | 21.74  | 84.97            | 18               | 217             | 17.19          | 427                           | 312.40          | 62.65                         | 27                           | -5.88 |
| E79           | 7.78 | 2287    | 1147    | 24.83  | 112.22           | 42.77            | 427.39          | 10.58          | 658.80                        | 653.20          | 112.65                        | 0                            | -6.02 |
| E80           | 7.25 | 4840    | 2421    | 22.63  | 110              | 56.24            | 245.74          | 6.85           | 302.60                        | 561.40          | 147.94                        | 4                            | -6.59 |
| E81           | 7.09 | 2757    | 1378    | 23.05  | 171.50           | 145.80           | 245.39          | 16.10          | 497.80                        | 823.00          | 89.12                         | 20                           | -2.93 |
| E82           | 7.75 | 1839    | 919     | 24.97  | 96.19            | 91.37            | 150             | 11             | 275.80                        | 539.00          | 100.88                        | 0                            | -6.60 |
| E83           | 7.75 | 9641    | 4818    | 19.29  | 450              | 260              | 1100            | 22.02          | 207.40                        | 3150.50         | 830.29                        | 38                           | -8.85 |
| E84           | 7.6  | 1322    | 660     | 19.5   | 123.45           | 6.80             | 226.65          | 15.66          | 500.20                        | 383.40          | 56.76                         | 8                            | -8.97 |
| E85           | 7.81 | 2284    | 1114    | 21.04  | 233.07           | 10.69            | 469.99          | 7.16           | 488                           | 653.20          | 89.12                         | 400                          | -2.35 |
| E86           | 7.85 | 1702    | 898     | 20.86  | 91.38            | 32.08            | 315.50          | 6              | 366                           | 553.80          | 92.06                         | 95                           | -8.65 |

| Sample      | pH   | EC      | TDS     | T      | Ca <sup>2+</sup> | Mg <sup>2+</sup> | Na <sup>+</sup> | K <sup>-</sup> | HCO <sub>3</sub> <sup>-</sup> | Cl <sup>-</sup> | SO <sub>4</sub> <sup>2-</sup> | NO <sub>3</sub> <sup>-</sup> | IB     |
|-------------|------|---------|---------|--------|------------------|------------------|-----------------|----------------|-------------------------------|-----------------|-------------------------------|------------------------------|--------|
|             |      | μS/cm   | mg/L    | °C     | mg/L             |                  |                 |                |                               |                 |                               |                              | %      |
| E87         | 7.95 | 12250   | 6125    | 17.26  | 849.70           | 83.59            | 1950            | 75.0           | 378.20                        | 4799.60         | 447.94                        | 135                          | -5.91  |
| E88         | 7.1  | 2800    | 1370    | 22.5   | 165              | 75.50            | 270             | 6.50           | 230.50                        | 605.50          | 160.50                        | 62                           | 2.24   |
| E89         | 7.65 | 2985    | 1494    | 23.06  | 145.89           | 93.31            | 394.70          | 6              | 439.20                        | 1036.60         | 74.41                         | 2                            | -8.17  |
| E90         | 7.82 | 2666    | 1332    | 20.04  | 193.99           | 69.98            | 297.05          | 3.82           | 353.80                        | 880.40          | 65.59                         | 65                           | -7.46  |
| E91         | 7.62 | 2663    | 1332    | 22.43  | 182.76           | 78.73            | 194.82          | 63.88          | 314.80                        | 637.80          | 145                           | 40                           | -2.13  |
| E92         | 7.88 | 2091    | 1047    | 19.65  | 145.89           | 36.52            | 292.95          | 26             | 600.50                        | 550.80          | 109.71                        | 14                           | -8.13  |
| E93         | 7.46 | 1559    | 780     | 20.83  | 152.30           | 16.52            | 436.38          | 12.22          | 561.20                        | 553.80          | 45                            | 0                            | 4.62   |
| E94         | 7.43 | 3386    | 1696    | 22.59  | 109.02           | 60.26            | 500.60          | 4.79           | 446.60                        | 908.20          | 112.65                        | 70                           | -5.99  |
| E95         | 9.11 | 2626    | 1314    | 24.14  | 100.00           | 76               | 335.60          | 5.13           | 150                           | 908.80          | 162.65                        | 28                           | -10.29 |
| E96         | 7.3  | 1811    | 913     | 2048   | 129.86           | 76.38            | 171.48          | 3.25           | 412.40                        | 482.20          | 142.06                        | 30                           | -7.93  |
| E97         | 7.55 | 1333    | 666     | 21.44  | 70.54            | 46.94            | 125             | 2.52           | 351.40                        | 226.60          | 109.71                        | 22                           | -6.89  |
| E98         | 7.69 | 1678    | 840     | 20.64  | 110              | 85               | 195.60          | 3.60           | 451.40                        | 515.40          | 124.41                        | 16                           | -8.07  |
| E99         | 7.17 | 1833    | 918     | 26.53  | 121.84           | 53.46            | 240             | 4.61           | 449                           | 510.60          | 121.47                        | 8                            | -7.44  |
| E100        | 7.43 | 1750    | 876     | 21.02  | 99.40            | 65               | 186.92          | 5.24           | 300.20                        | 388.60          | 162.65                        | 8                            | -2.17  |
| E101        | 7.22 | 2099    | 1050    | 23.36  | 139.48           | 62.21            | 139.73          | 4.37           | 327                           | 439             | 115.59                        | 12                           | -5.37  |
| E102        | 7.34 | 1962    | 982     | 85.74  | 129.86           | 52.49            | 134.72          | 5.04           | 349                           | 382.20          | 121.47                        | 10                           | -6.68  |
| E103        | 8.21 | 1751    | 876     | 18.11  | 118.64           | 47.63            | 119.02          | 5.76           | 214.80                        | 382.20          | 130.29                        | 0                            | -5.75  |
| E104        | 7.54 | 1729    | 865     | 20.67  | 101.00           | 89.57            | 195.67          | 5.14           | 380                           | 460.60          | 180.29                        | 5                            | -4.54  |
| E105        | 7.53 | 1991    | 797     | 22.54  | 109.02           | 71.52            | 192.96          | 6.83           | 336.80                        | 482.20          | 174.41                        | 2                            | -6.78  |
| <b>Min</b>  | 7.09 | 880     | 440     | 17.26  | 64.13            | 6.804            | 84.28           | 1.77           | 150                           | 226.60          | 30.29                         | 0                            | -10.29 |
| <b>Max</b>  | 9.11 | 12250   | 11146   | 2305   | 849.70           | 260              | 1950            | 75             | 658.8                         | 4799.60         | 830.29                        | 400                          | 4.62   |
| <b>Mean</b> | 7.62 | 2775.40 | 1715.87 | 231.83 | 163.29           | 67.27            | 346.92          | 12.20          | 381.71                        | 814.25          | 145.12                        | 38.53                        | -5.92  |
| <b>Sd</b>   | 0.38 | 2394.10 | 2146.45 | 635.64 | 147.32           | 46.35            | 359.90          | 16.71          | 116.40                        | 921.05          | 148.96                        | 75.18                        | 3.32   |

**Table S2.** The IWQI values of all 105 samples in the study area.

| Sample        | pH   | EC      | Cl <sup>-</sup> | NO <sub>3</sub> <sup>-</sup> | HCO <sub>3</sub> <sup>-</sup> | PI    | %NA   | SAR   | MH    | PS    | KI   | IWQI   |
|---------------|------|---------|-----------------|------------------------------|-------------------------------|-------|-------|-------|-------|-------|------|--------|
| Campaign 2009 |      |         |                 |                              |                               |       |       |       |       |       |      |        |
| E1            | 7.37 | 2440    | 13.42           | 0.50                         | 2.40                          | 78.39 | 69.41 | 7.21  | 61.43 | 14.76 | 2.24 | 110.59 |
| E2            | 7.31 | 3520    | 21.63           | 1.44                         | 1.80                          | 82.47 | 77.30 | 11.31 | 66.60 | 22.93 | 3.36 | 149.90 |
| E3            | 7.41 | 2040    | 9.81            | 0.73                         | 3.40                          | 81.33 | 69.05 | 6.45  | 55.48 | 10.90 | 2.15 | 100.07 |
| E4            | 7.4  | 2249    | 11.02           | 0.01                         | 2.90                          | 74.52 | 63.39 | 5.51  | 61.00 | 12.08 | 1.68 | 96.46  |
| E5            | 7.41 | 1763    | 6.81            | 0.17                         | 3.60                          | 71.37 | 54.78 | 3.79  | 56.77 | 8.07  | 1.19 | 78.56  |
| E6            | 7.5  | 1720    | 7.21            | 0.22                         | 3.20                          | 65.37 | 50.05 | 3.29  | 59.53 | 8.45  | 0.98 | 77.81  |
| E7            | 7.3  | 1671    | 6.15            | 0.11                         | 2.90                          | 73.23 | 57.33 | 3.94  | 57.70 | 7.31  | 1.32 | 75.42  |
| E8            | 7.39 | 1947    | 9.01            | 0.13                         | 3.00                          | 77.39 | 63.95 | 5.30  | 62.95 | 10.18 | 1.75 | 91.77  |
| E9            | 7.15 | 2180    | 10.01           | 0.44                         | 3.10                          | 75.83 | 63.99 | 5.70  | 60.27 | 11.36 | 1.76 | 91.97  |
| E10           | 7.17 | 1969    | 7.63            | 0.13                         | 3.20                          | 73.54 | 58.19 | 4.22  | 60.32 | 8.72  | 1.36 | 79.51  |
| E11           | 7.24 | 2550    | 12.48           | 0.82                         | 2.40                          | 75.06 | 65.45 | 6.21  | 63.58 | 13.48 | 1.88 | 103.29 |
| E12           | 7.44 | 2130    | 9.71            | 3.21                         | 3.20                          | 84.29 | 72.83 | 7.65  | 59.45 | 10.18 | 2.64 | 113.32 |
| E13           | 7.69 | 2340    | 11.86           | 0.00                         | 3.80                          | 85.54 | 74.55 | 8.41  | 56.75 | 13.25 | 2.84 | 117.74 |
| <b>Min</b>    | 7.15 | 1671.00 | 6.15            | 0.00                         | 1.80                          | 65.37 | 50.05 | 3.29  | 55.48 | 7.31  | 0.98 | 75.42  |
| <b>Max</b>    | 7.69 | 3520.00 | 21.63           | 3.21                         | 3.80                          | 85.54 | 77.30 | 11.31 | 66.60 | 22.93 | 3.36 | 149.90 |
| <b>Mean</b>   | 7.37 | 2193.77 | 10.52           | 0.61                         | 2.99                          | 76.79 | 64.64 | 6.08  | 60.14 | 11.67 | 1.93 | 98.95  |
| Campaign 2017 |      |         |                 |                              |                               |       |       |       |       |       |      |        |
| E14           | 7.7  | 3066    | 30.84           | 0.19                         | 6.00                          | 69.37 | 62.52 | 8.30  | 48.73 | 31.35 | 1.64 | 152.74 |
| E15           | 7.3  | 4226    | 42.86           | 0.27                         | 4.00                          | 33.13 | 29.12 | 3.19  | 41.92 | 44.26 | 0.40 | 156.38 |
| E16           | 7.8  | 762     | 4.81            | 0.50                         | 4.30                          | 56.37 | 38.17 | 2.23  | 39.48 | 4.98  | 0.60 | 62.25  |
| E17           | 7.7  | 926     | 4.81            | 0.99                         | 3.10                          | 51.61 | 35.70 | 1.99  | 39.48 | 5.00  | 0.54 | 60.28  |
| E18           | 7.6  | 2550    | 22.43           | 0.19                         | 6.30                          | 38.88 | 31.20 | 2.72  | 47.19 | 23.06 | 0.43 | 107.63 |
| E19           | 7.6  | 2866    | 29.64           | 0.19                         | 3.60                          | 42.16 | 36.38 | 3.43  | 45.38 | 30.66 | 0.56 | 126.77 |
| E20           | 7.7  | 2835    | 22.43           | 1.41                         | 5.10                          | 58.39 | 50.33 | 5.07  | 43.28 | 23.52 | 0.99 | 125.11 |
| E21           | 7.1  | 2429    | 22.83           | 0.45                         | 7.00                          | 53.68 | 44.11 | 4.18  | 59.78 | 23.28 | 0.77 | 109.60 |
| E22           | 7.8  | 2333    | 23.63           | 0.60                         | 3.60                          | 38.31 | 32.42 | 2.97  | 52.37 | 24.49 | 0.47 | 113.74 |
| E23           | 7.5  | 2442    | 18.43           | 0.57                         | 4.70                          | 52.44 | 43.93 | 4.00  | 48.82 | 19.80 | 0.77 | 104.45 |
| E24           | 7.5  | 724     | 5.61            | 0.11                         | 5.60                          | 69.52 | 49.10 | 2.99  | 45.71 | 5.88  | 0.89 | 65.67  |
| E25           | 7.6  | 7555    | 88.52           | 1.21                         | 4.40                          | 66.80 | 65.26 | 15.08 | 49.52 | 91.20 | 1.83 | 320.55 |
| E26           | 7.3  | 2049    | 14.82           | 1.31                         | 7.90                          | 66.21 | 54.69 | 5.48  | 47.00 | 15.42 | 1.18 | 101.06 |
| E27           | 7.5  | 1453    | 12.82           | 0.10                         | 5.20                          | 54.83 | 43.33 | 3.38  | 41.68 | 12.94 | 0.74 | 81.16  |
| E28           | 7.9  | 1859    | 14.42           | 0.26                         | 9.30                          | 66.14 | 55.53 | 4.76  | 42.05 | 15.02 | 1.06 | 105.74 |
| E29           | 7.5  | 3173    | 22.40           | 1.02                         | 7.80                          | 70.33 | 61.13 | 7.35  | 59.84 | 23.49 | 1.54 | 135.92 |
| E30           | 7.4  | 2913    | 20.83           | 2.04                         | 6.60                          | 63.16 | 56.31 | 6.92  | 42.10 | 22.02 | 1.26 | 124.14 |
| E31           | 8    | 1772    | 14.02           | 0.87                         | 4.40                          | 60.86 | 49.09 | 3.88  | 58.32 | 14.60 | 0.93 | 103.84 |
| E32           | 7.6  | 1298    | 10.01           | 0.34                         | 5.40                          | 50.54 | 38.79 | 2.85  | 39.29 | 10.92 | 0.60 | 74.82  |
| E33           | 7.4  | 1935    | 13.32           | 0.60                         | 6.50                          | 50.57 | 38.57 | 3.09  | 56.32 | 14.26 | 0.61 | 87.47  |
| E34           | 8    | 1151    | 6.60            | 0.16                         | 5.46                          | 76.42 | 57.36 | 4.18  | 56.24 | 7.51  | 1.30 | 88.32  |
| E35           | 7.7  | 1558    | 11.62           | 0.38                         | 6.20                          | 49.21 | 35.51 | 2.56  | 57.73 | 12.86 | 0.54 | 85.16  |
| E36           | 7.4  | 1110    | 8.81            | 0.14                         | 5.20                          | 54.74 | 38.77 | 2.53  | 50.93 | 9.80  | 0.62 | 69.32  |
| E37           | 7.5  | 1836    | 12.99           | 0.15                         | 5.70                          | 56.95 | 44.32 | 3.47  | 54.76 | 14.51 | 0.77 | 89.75  |
| E38           | 7.8  | 1757    | 14.02           | 0.28                         | 5.10                          | 51.39 | 40.00 | 3.09  | 65.47 | 15.65 | 0.65 | 96.59  |
| E39           | 7.2  | 2023    | 15.22           | 0.78                         | 5.00                          | 46.87 | 36.36 | 2.84  | 56.18 | 16.03 | 0.56 | 86.41  |

| Sample        | pH   | EC      | Cl <sup>-</sup> | NO <sub>3</sub> <sup>-</sup> | HCO <sub>3</sub> <sup>-</sup> | PI    | %NA   | SAR   | MH    | PS    | KI   | IWQI   |
|---------------|------|---------|-----------------|------------------------------|-------------------------------|-------|-------|-------|-------|-------|------|--------|
| E40           | 7.8  | 2293    | 16.02           | 0.15                         | 6.10                          | 55.49 | 45.64 | 4.01  | 61.52 | 17.37 | 0.80 | 106.54 |
| E41           | 7.8  | 1771    | 15.62           | 0.17                         | 4.00                          | 45.22 | 36.74 | 2.80  | 60.35 | 16.74 | 0.55 | 95.05  |
| E42           | 7.6  | 2298    | 19.23           | 0.44                         | 5.60                          | 48.26 | 38.99 | 3.41  | 41.38 | 20.93 | 0.63 | 104.09 |
| E43           | 7.3  | 1896    | 13.62           | 0.24                         | 6.20                          | 48.07 | 35.97 | 2.74  | 55.68 | 14.61 | 0.55 | 83.26  |
| E44           | 7.2  | 1892    | 13.22           | 0.25                         | 6.00                          | 49.20 | 36.65 | 2.73  | 49.34 | 14.62 | 0.56 | 80.24  |
| <b>Min</b>    | 7.10 | 724.00  | 4.81            | 0.10                         | 3.10                          | 33.13 | 29.12 | 1.99  | 39.29 | 4.98  | 0.40 | 60.28  |
| <b>Max</b>    | 8.00 | 7555.00 | 88.52           | 2.04                         | 9.30                          | 76.42 | 65.26 | 15.08 | 65.47 | 91.20 | 1.83 | 320.55 |
| <b>Mean</b>   | 7.57 | 2217.77 | 18.92           | 0.53                         | 5.53                          | 54.68 | 43.94 | 4.14  | 50.25 | 19.90 | 0.82 | 106.58 |
| Campaign 2018 |      |         |                 |                              |                               |       |       |       |       |       |      |        |
| E45           | 7.73 | 3608    | 28.34           | 0.06                         | 4.10                          | 62.49 | 57.18 | 6.80  | 40.22 | 28.45 | 1.28 | 141.24 |
| E46           | 7.82 | 916     | 2.79            | 0.46                         | 3.80                          | 69.73 | 44.57 | 2.29  | 27.52 | 3.06  | 0.79 | 60.58  |
| E47           | 7.6  | 1082    | 8.01            | 0.47                         | 4.70                          | 48.13 | 30.13 | 1.74  | 58.64 | 8.31  | 0.43 | 67.77  |
| E48           | 7.39 | 4933    | 38.29           | 0.22                         | 2.70                          | 47.45 | 44.59 | 5.60  | 32.05 | 40.07 | 0.78 | 157.76 |
| E49           | 7.2  | 2794    | 17.75           | 0.35                         | 5.70                          | 51.60 | 42.66 | 3.95  | 49.40 | 18.42 | 0.73 | 97.91  |
| E50           | 7.82 | 2638    | 15.24           | 0.67                         | 4.30                          | 49.09 | 40.78 | 3.67  | 47.50 | 17.13 | 0.68 | 102.86 |
| E51           | 7.86 | 1960    | 10.96           | 0.00                         | 2.70                          | 48.24 | 39.19 | 2.74  | 54.24 | 12.27 | 0.61 | 85.35  |
| E52           | 7.99 | 2716    | 15.29           | 0.00                         | 5.00                          | 46.45 | 36.41 | 2.85  | 43.69 | 15.57 | 0.55 | 99.21  |
| E53           | 7.64 | 3034    | 21.73           | 0.04                         | 3.30                          | 50.94 | 44.63 | 4.40  | 41.76 | 22.94 | 0.80 | 113.98 |
| E54           | 7.92 | 2731    | 18.68           | 1.08                         | 3.70                          | 46.17 | 38.69 | 3.45  | 41.18 | 19.86 | 0.62 | 110.33 |
| E55           | 8.09 | 6716    | 54.44           | 0.65                         | 3.10                          | 59.46 | 57.21 | 9.72  | 34.05 | 58.67 | 1.31 | 233.77 |
| E56           | 7.9  | 2428    | 13.34           | 0.00                         | 4.60                          | 65.72 | 56.39 | 5.50  | 51.02 | 14.98 | 1.26 | 107.10 |
| E57           | 7.77 | 1557    | 7.11            | 0.10                         | 4.10                          | 60.77 | 46.40 | 3.10  | 29.41 | 7.93  | 0.82 | 73.32  |
| E58           | 8.4  | 9744    | 89.08           | 2.08                         | 2.30                          | 66.24 | 65.29 | 15.28 | 56.35 | 92.44 | 1.83 | 352.29 |
| E59           | 8.05 | 1842    | 8.67            | 1.53                         | 3.30                          | 70.32 | 57.59 | 4.58  | 40.71 | 9.49  | 1.33 | 97.05  |
| E60           | 7.37 | 3408    | 22.54           | 6.42                         | 4.30                          | 56.31 | 51.41 | 6.21  | 37.77 | 24.41 | 1.03 | 138.75 |
| E61           | 7.22 | 2699    | 16.29           | 0.98                         | 3.90                          | 52.73 | 45.00 | 4.22  | 42.14 | 17.87 | 0.81 | 96.29  |
| E62           | 7.71 | 2163    | 14.02           | 0.25                         | 9.00                          | 67.93 | 54.12 | 4.78  | 39.65 | 14.57 | 1.11 | 102.69 |
| E63           | 7.47 | 1602    | 8.98            | 0.00                         | 5.00                          | 55.08 | 39.68 | 2.57  | 26.74 | 9.01  | 0.63 | 67.54  |
| E64           | 7.43 | 3482    | 21.58           | 1.08                         | 6.50                          | 73.34 | 64.84 | 8.25  | 56.27 | 22.92 | 1.82 | 136.92 |
| E65           | 8.65 | 2965    | 20.15           | 0.53                         | 0.20                          | 55.69 | 54.30 | 5.71  | 59.26 | 21.93 | 1.17 | 137.03 |
| E66           | 7.25 | 2176    | 10.61           | 0.56                         | 5.50                          | 44.39 | 31.63 | 2.25  | 51.35 | 11.99 | 0.45 | 75.13  |
| E67           | 7.77 | 1258    | 5.21            | 0.40                         | 5.20                          | 60.37 | 42.54 | 2.75  | 59.99 | 6.17  | 0.72 | 73.30  |
| E68           | 7.51 | 1773    | 10.82           | 0.27                         | 5.80                          | 48.13 | 33.78 | 2.38  | 59.41 | 12.06 | 0.51 | 79.96  |
| E69           | 7.29 | 2054    | 13.62           | 0.19                         | 6.30                          | 50.99 | 38.45 | 3.05  | 49.33 | 14.79 | 0.62 | 84.55  |
| E70           | 7.34 | 1967    | 9.92            | 0.14                         | 5.20                          | 51.50 | 38.91 | 2.91  | 48.22 | 11.28 | 0.63 | 75.62  |
| E71           | 7.5  | 1957    | 9.86            | 0.14                         | 4.40                          | 56.02 | 43.88 | 3.36  | 52.58 | 11.44 | 0.77 | 81.54  |
| E72           | 7.48 | 2187    | 11.96           | 0.04                         | 4.60                          | 54.38 | 43.13 | 3.41  | 54.67 | 13.61 | 0.74 | 87.16  |
| E73           | 8.24 | 1896    | 10.69           | 0.00                         | 3.10                          | 63.43 | 52.64 | 4.22  | 47.57 | 12.38 | 1.09 | 99.52  |
| E74           | 7.45 | 1900    | 12.42           | 0.10                         | 5.90                          | 55.79 | 42.80 | 3.41  | 55.29 | 13.84 | 0.74 | 87.15  |
| E75           | 7.34 | 3184    | 12.15           | 0.56                         | 5.12                          | 59.66 | 48.20 | 4.09  | 54.76 | 13.75 | 0.92 | 95.86  |
| <b>Min</b>    | 7.20 | 916.00  | 2.79            | 0.00                         | 0.20                          | 44.39 | 30.13 | 1.74  | 26.74 | 3.06  | 0.43 | 60.58  |
| <b>Max</b>    | 8.65 | 9744.00 | 89.08           | 6.42                         | 9.00                          | 73.34 | 65.29 | 15.28 | 59.99 | 92.44 | 1.83 | 352.29 |
| <b>Mean</b>   | 7.68 | 2753.87 | 18.08           | 0.62                         | 4.43                          | 56.40 | 46.03 | 4.49  | 46.54 | 19.41 | 0.89 | 110.31 |
| Campaign 2019 |      |         |                 |                              |                               |       |       |       |       |       |      |        |
| E76           | 7.53 | 3800    | 40.06           | 0.07                         | 5.00                          | 68.92 | 63.10 | 9.06  | 33.51 | 40.37 | 1.71 | 171.77 |

| Sample      | pH   | EC       | Cl <sup>-</sup> | NO <sub>3</sub> <sup>-</sup> | HCO <sub>3</sub> <sup>-</sup> | PI    | %NA   | SAR   | MH    | PS     | KI   | IWQI   |
|-------------|------|----------|-----------------|------------------------------|-------------------------------|-------|-------|-------|-------|--------|------|--------|
| E77         | 7.63 | 947      | 6.39            | 0.48                         | 6.16                          | 53.38 | 32.12 | 1.85  | 59.23 | 6.77   | 0.47 | 66.71  |
| E78         | 7.66 | 880      | 8.81            | 0.44                         | 7.00                          | 79.71 | 63.33 | 5.58  | 25.89 | 9.46   | 1.65 | 86.50  |
| E79         | 7.78 | 2287     | 18.43           | 0.00                         | 10.80                         | 78.95 | 67.41 | 8.71  | 38.59 | 19.60  | 2.04 | 128.80 |
| E80         | 7.25 | 4840     | 15.84           | 0.06                         | 4.96                          | 62.08 | 51.78 | 4.75  | 45.74 | 17.38  | 1.06 | 111.00 |
| E81         | 7.09 | 2757     | 23.22           | 0.32                         | 8.16                          | 43.33 | 35.04 | 3.33  | 58.36 | 24.14  | 0.52 | 108.00 |
| E82         | 7.75 | 1839     | 15.20           | 0.00                         | 4.52                          | 45.91 | 35.59 | 2.63  | 61.03 | 16.25  | 0.53 | 93.18  |
| E83         | 7.75 | 9641     | 88.87           | 0.61                         | 3.40                          | 54.19 | 52.47 | 10.22 | 48.79 | 97.51  | 1.09 | 330.87 |
| E84         | 7.6  | 1322     | 10.82           | 0.13                         | 8.20                          | 76.74 | 60.42 | 5.38  | 8.33  | 11.41  | 1.47 | 86.98  |
| E85         | 7.81 | 2284     | 18.43           | 6.45                         | 8.00                          | 70.62 | 62.25 | 8.17  | 7.03  | 19.35  | 1.63 | 135.99 |
| E86         | 7.85 | 1702     | 15.62           | 1.53                         | 6.00                          | 77.30 | 65.84 | 7.23  | 36.66 | 16.58  | 1.91 | 118.21 |
| E87         | 7.95 | 12250    | 135.39          | 2.18                         | 6.20                          | 65.11 | 63.77 | 17.09 | 13.96 | 140.05 | 1.72 | 462.91 |
| E88         | 7.1  | 2800     | 17.08           | 1.00                         | 3.78                          | 52.27 | 45.19 | 4.37  | 43.00 | 18.75  | 0.81 | 96.86  |
| E89         | 7.65 | 2985     | 29.24           | 0.03                         | 7.20                          | 61.79 | 53.66 | 6.28  | 51.33 | 30.02  | 1.15 | 141.93 |
| E90         | 7.82 | 2666     | 24.83           | 1.05                         | 5.80                          | 54.05 | 45.75 | 4.65  | 37.29 | 25.52  | 0.84 | 126.89 |
| E91         | 7.62 | 2663     | 17.99           | 0.65                         | 5.16                          | 44.64 | 39.32 | 3.03  | 41.53 | 19.50  | 0.54 | 102.38 |
| E92         | 7.88 | 2091     | 15.54           | 0.23                         | 9.84                          | 68.96 | 56.59 | 5.62  | 29.21 | 16.68  | 1.24 | 110.48 |
| E93         | 7.46 | 1559     | 15.62           | 0.00                         | 9.20                          | 78.79 | 68.29 | 8.97  | 15.17 | 16.09  | 2.12 | 106.52 |
| E94         | 7.43 | 3386     | 25.62           | 1.13                         | 7.32                          | 76.09 | 67.80 | 9.55  | 47.68 | 26.79  | 2.09 | 148.20 |
| E95         | 9.11 | 2626     | 25.64           | 0.45                         | 2.46                          | 62.56 | 56.71 | 6.16  | 55.62 | 27.33  | 1.30 | 159.44 |
| E96         | 7.3  | 1811     | 13.60           | 0.48                         | 6.76                          | 49.74 | 37.14 | 2.95  | 49.23 | 15.08  | 0.58 | 84.40  |
| E97         | 7.55 | 1333     | 6.39            | 0.35                         | 5.76                          | 61.14 | 42.70 | 2.83  | 52.32 | 7.53   | 0.74 | 71.95  |
| E98         | 7.69 | 1678     | 14.54           | 0.26                         | 7.40                          | 53.49 | 40.79 | 3.41  | 56.02 | 15.83  | 0.68 | 95.71  |
| E99         | 7.17 | 1833     | 14.40           | 0.13                         | 7.36                          | 62.88 | 50.19 | 4.56  | 41.98 | 15.67  | 1.00 | 89.50  |
| E100        | 7.43 | 1750     | 10.96           | 0.13                         | 4.92                          | 56.13 | 44.50 | 3.58  | 51.88 | 12.65  | 0.79 | 82.45  |
| E101        | 7.22 | 2099     | 12.38           | 0.19                         | 5.36                          | 46.23 | 33.88 | 2.47  | 42.37 | 13.59  | 0.50 | 76.16  |
| E102        | 7.34 | 1962     | 10.78           | 0.16                         | 5.72                          | 49.53 | 35.67 | 2.52  | 39.99 | 12.05  | 0.54 | 74.80  |
| E103        | 8.21 | 1751     | 10.78           | 0.00                         | 3.52                          | 46.97 | 35.11 | 2.33  | 39.83 | 12.14  | 0.53 | 86.57  |
| E104        | 7.54 | 1729     | 12.99           | 0.08                         | 6.23                          | 52.61 | 41.05 | 3.42  | 59.38 | 14.87  | 0.69 | 89.71  |
| E105        | 7.53 | 1991     | 13.60           | 0.03                         | 5.52                          | 54.48 | 43.07 | 3.53  | 51.96 | 15.42  | 0.74 | 91.29  |
| <b>Min</b>  | 7.09 | 880.00   | 6.39            | 0.00                         | 2.46                          | 43.33 | 32.12 | 1.85  | 7.03  | 6.77   | 0.47 | 66.71  |
| <b>Max</b>  | 9.11 | 12250.00 | 135.39          | 6.45                         | 10.80                         | 79.71 | 68.29 | 17.09 | 61.03 | 140.05 | 2.12 | 462.91 |
| <b>Mean</b> | 7.62 | 2775.40  | 22.97           | 0.62                         | 6.26                          | 60.29 | 49.69 | 5.47  | 41.43 | 24.48  | 1.09 | 124.54 |
